# Supplementary material for: Electrostatic interaction-controlled dispersion of carbon nanotubes in a ternary composite for high-performance supercapacitors
Source: Royal Society of Chemistry journal article supplement (doi:10.1039/d2dt00125j), 2022-01-01
Supplement: d2dt00125j1.pdf [file d2dt00125j1.pdf]

## Supporting Information

### Electrostatic interactions-controlled dispersion of carbon nanotubes in ternary composite for high-performance supercapacitors

Jing Gao,<sup>\*a</sup> Zhengyang Xing,<sup>a</sup> Junxi Zhou,<sup>a</sup> Haolan Xu,<sup>a</sup> Zhimin Wang,<sup>a</sup> Guohua Li,<sup>a</sup>

and Lili Yu<sup>\*b</sup>

<sup>a</sup> College of Chemical Engineering, Zhejiang University of Technology, Hangzhou 310014, P. R. China

<sup>b</sup> School of Material Science and Engineering, Shanghai University, Shanghai 200444, P. R. China

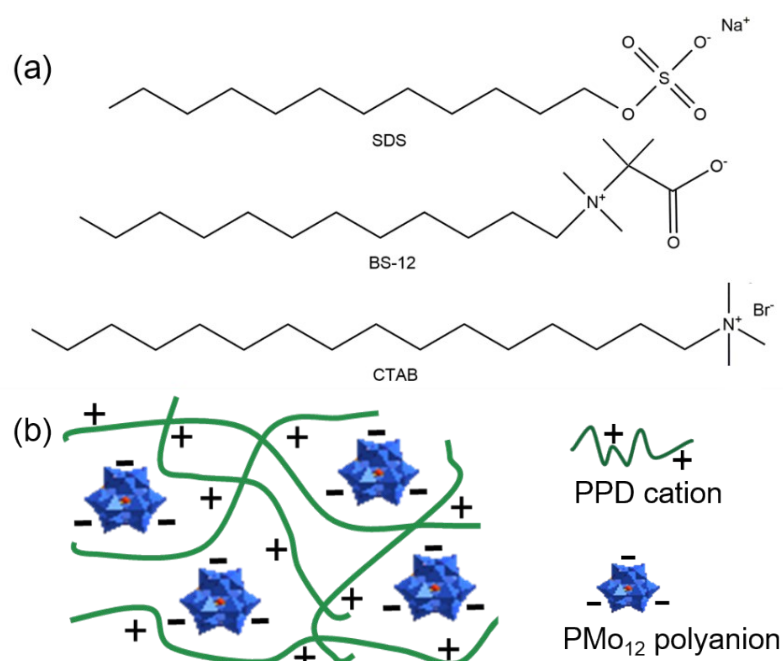

**Figure S1.** (a) Chemical structure of different ionic surfactants and (b) scheme image of PPD-PMo<sub>12</sub> network.

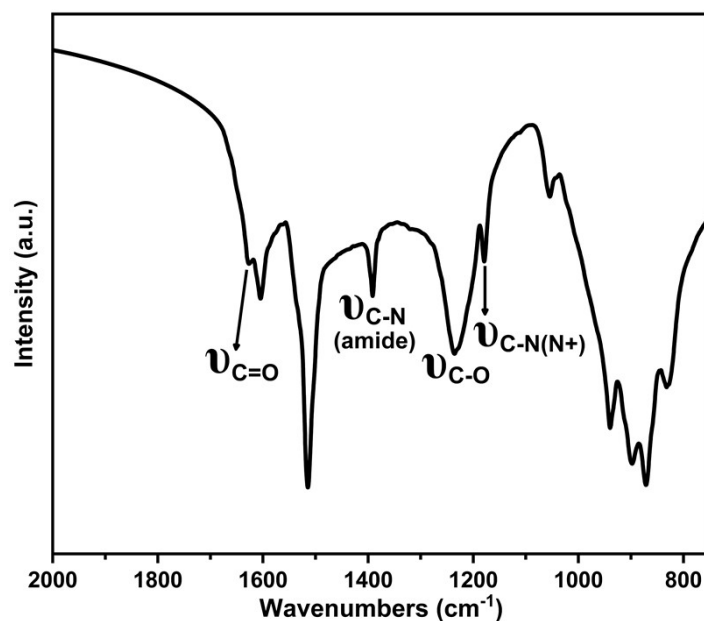

**Figure S2** FTIR spectrum of DMoC.

FTIR spectrum of PPD-PMo<sub>12</sub>@CNT (denoted as DMoC) shows characteristic peak of amide C=O (1624 cm<sup>-1</sup>) and amide C–N (1391 cm<sup>-1</sup>), indicating **CNT and PPD-PMo<sub>12</sub> were covalently connected**. The formation mechanism of DMoC is as follows: the PMo<sub>12</sub> with strong oxidative ability first initializes the polymerization of p-phenylenediamine (p-PD) to PPD and itself transforms to reduced-PMo<sub>12</sub>. On addition of carboxylated CNT, the reduced-PMo<sub>12</sub> turns back to PMo<sub>12</sub> by reducing the CNT. Meanwhile, the PPD polymer with abundant amine groups forms amide bonds with CNT containing carboxyl groups, leading to formation of the DMoC composite.

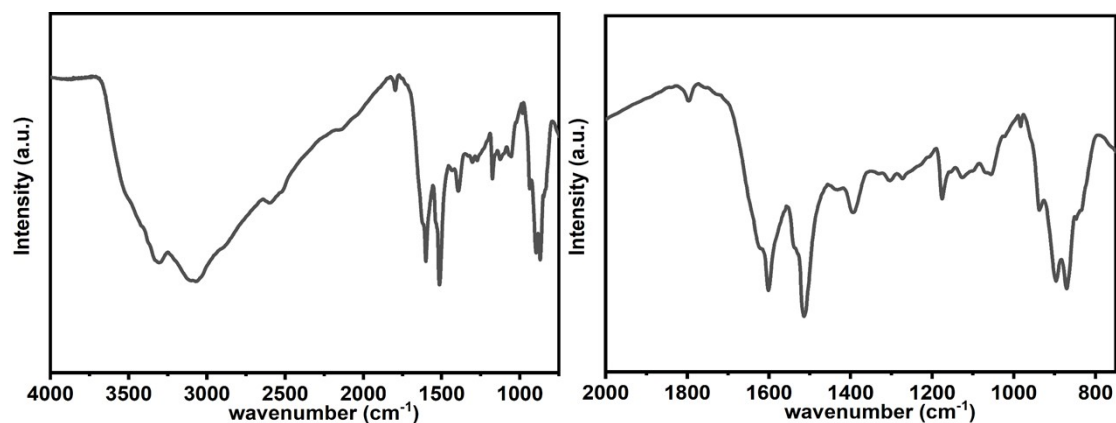

**Figure S3** FTIR spectrum of DMoGC-0.

FTIR spectrum of DMoGC-0 was tested and compared with that of DMoGC-SDS and DMoGC-CTAB, which showed very similar patterns.

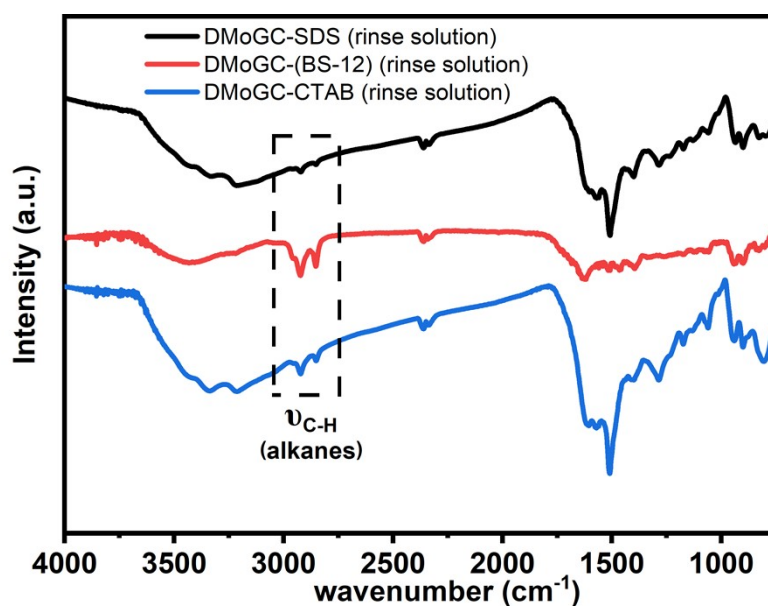

**Fig. S4** FTIR spectrum of the rinse solution of DMoGC-SDS, DMoGC-(BS-12) and DMoGC-CTAB.

The obtained FTIR spectrum clearly present characteristic absorption peaks of aliphatic  $-CH_2$ , indicating the presence of surfactants in the rinse solution of the DMoGC samples.

**Table S1.** FTIR data analysis of different DMOGC samples.

| Characteristic vibration          | Wavenumber (cm <sup>-1</sup> ) | Samples                              |
|-----------------------------------|--------------------------------|--------------------------------------|
| $\nu_{\text{N-H}}$                | 3380                           | DMoGC-(BS-12)                        |
| $\nu_{\text{C-H(alkanes)}}$       | 2921, 2852                     | DMoGC-(BS-12)                        |
| $\nu_{\text{C=O}}$                | 1624                           | DMoGC-SDS, DMoGC-(BS-12), DMoGC-CTAB |
| $\nu_{\text{C=C(aromatic)}}$      | 1600, 1510                     | DMoGC-SDS, DMoGC-CTAB, DMoGC-(BS-12) |
| $\delta_{\text{C-H(alkanes)}}$    | 1465                           | DMoGC-(BS-12)                        |
| $\nu_{\text{C-N(amide)}}$         | 1391                           | DMoGC-SDS, DMoGC-CTAB, DMoGC-(BS-12) |
| $\nu_{\text{C-N(primary amine)}}$ | 1326                           | DMoGC-(BS-12)                        |
| $\nu_{\text{C-O}}$                | 1232                           | DMoGC-SDS, DMoGC-CTAB                |
| $\nu_{\text{C-N(N+)}}$            | 1176                           | DMoGC-SDS, DMoGC-CTAB                |
| $\nu_{\text{O=P-O-}}$             | 1074                           | DMoGC-(BS-12)                        |
| $\nu_{\text{O=P-O-}}$             | 1052                           | DMoGC-SDS, DMoGC-CTAB                |
| $\nu_{\text{Mo=O}}$               | 938                            | DMoGC-SDS, DMoGC-CTAB                |
| $\nu_{\text{Mo-O-Mo}}$            | 895, 869                       | DMoGC-SDS, DMoGC-CTAB                |
| $\nu_{\text{Mo-O-Mo}}$            | 891                            | DMoGC-(BS-12)                        |

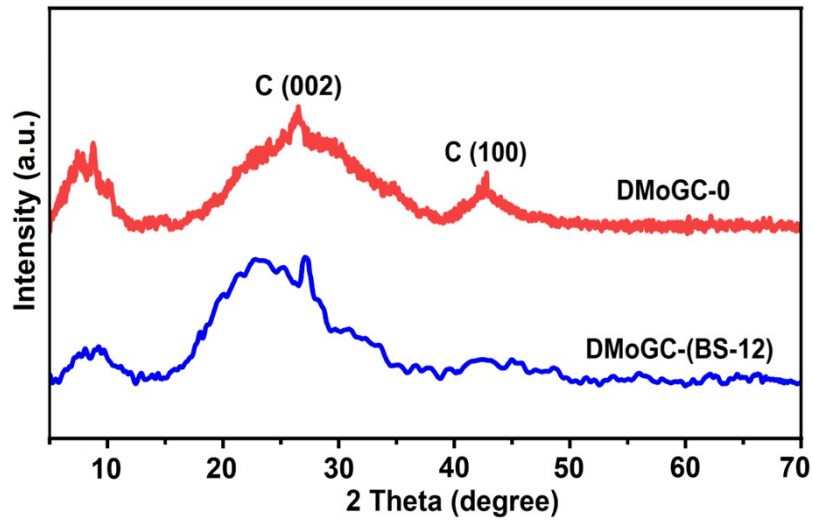

**Figure S5.** XRD patterns of DMoGC-0 and DMoGC-(BS-12).

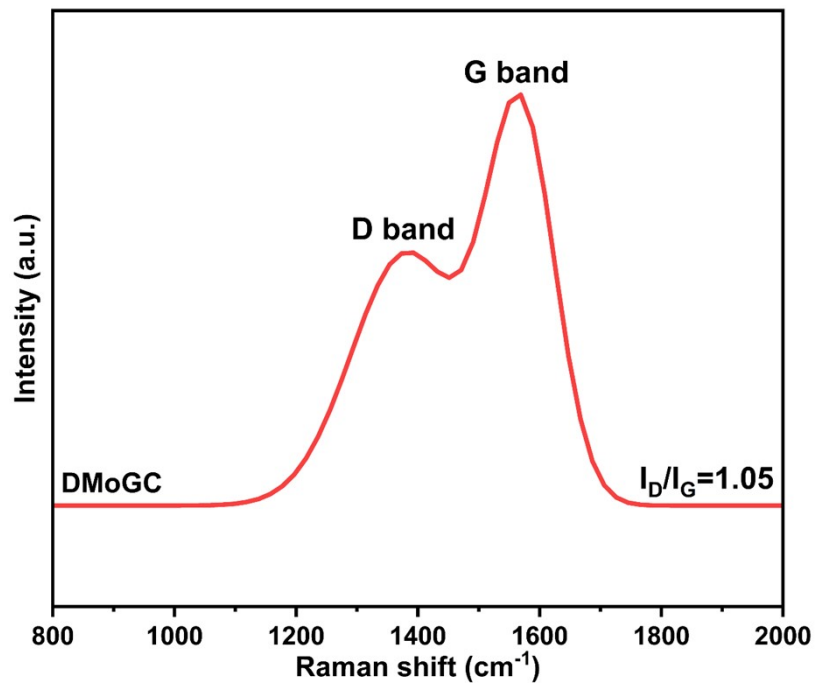

**Figure S6.** Raman spectrum of DMoGC-0.

**Table S2.** Textural parameters of different samples

| Samples       | $S_{\text{BET}}^{\text{a}}$<br>/ $\text{m}^2 \cdot \text{g}^{-1}$ | $V_{\text{T}}^{\text{b}}$<br>/ $\text{cm}^3 \cdot \text{g}^{-1}$ | $S_{\text{micro}}^{\text{c}}$<br>/ $\text{m}^2 \cdot \text{g}^{-1}$ | $V_{\text{micro}}^{\text{d}}$<br>/ $\text{cm}^3 \cdot \text{g}^{-1}$ | $S_{\text{E}}^{\text{e}}$<br>/ $\text{m}^2 \cdot \text{g}^{-1}$ | $D^{\text{f}}$<br>/ $\text{nm}$ |
|---------------|-------------------------------------------------------------------|------------------------------------------------------------------|---------------------------------------------------------------------|----------------------------------------------------------------------|-----------------------------------------------------------------|---------------------------------|
| DMoGC-SDS     | 131.4                                                             | 0.25                                                             | 3.4                                                                 | 0.006                                                                | 128.0                                                           | 8.6                             |
| DMoGC-(BS-12) | 74.6                                                              | 0.14                                                             | 0.5                                                                 | 0.001                                                                | 73.1                                                            | 15.5                            |
| DMoGC-CTAB    | 152.3                                                             | 0.29                                                             | 7.4                                                                 | 0.014                                                                | 144.9                                                           | 7.0                             |

<sup>a</sup> BET surface area; <sup>b</sup> Total pore volume at  $(P/P_0) = 0.992$ ; <sup>c</sup> t-Plot micropore area; <sup>d</sup> t-Plot micropore volume; <sup>e</sup> t-Plot external surface area; <sup>f</sup> average pore width.

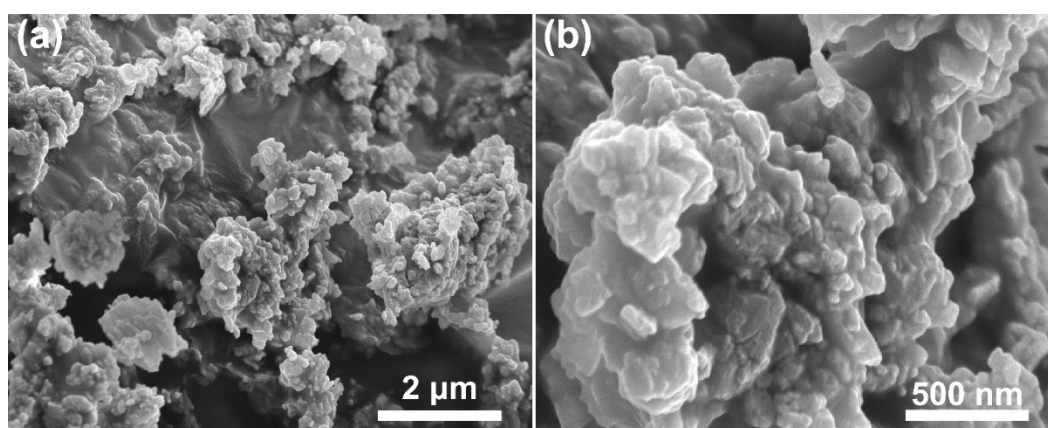

**Figure S7.** SEM images of PPD- $\text{PMo}_{12}$ .

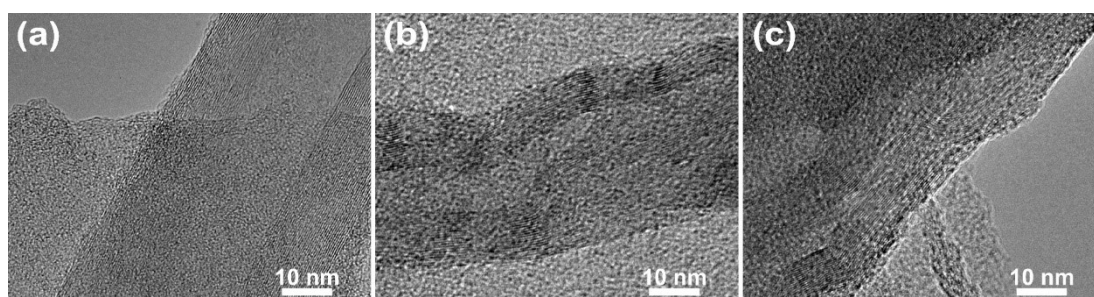

**Figure S8.** TEM images of (a) DMoGC-SDS, (b) and DMoGC-(BS-12) and DMoGC-CTAB.

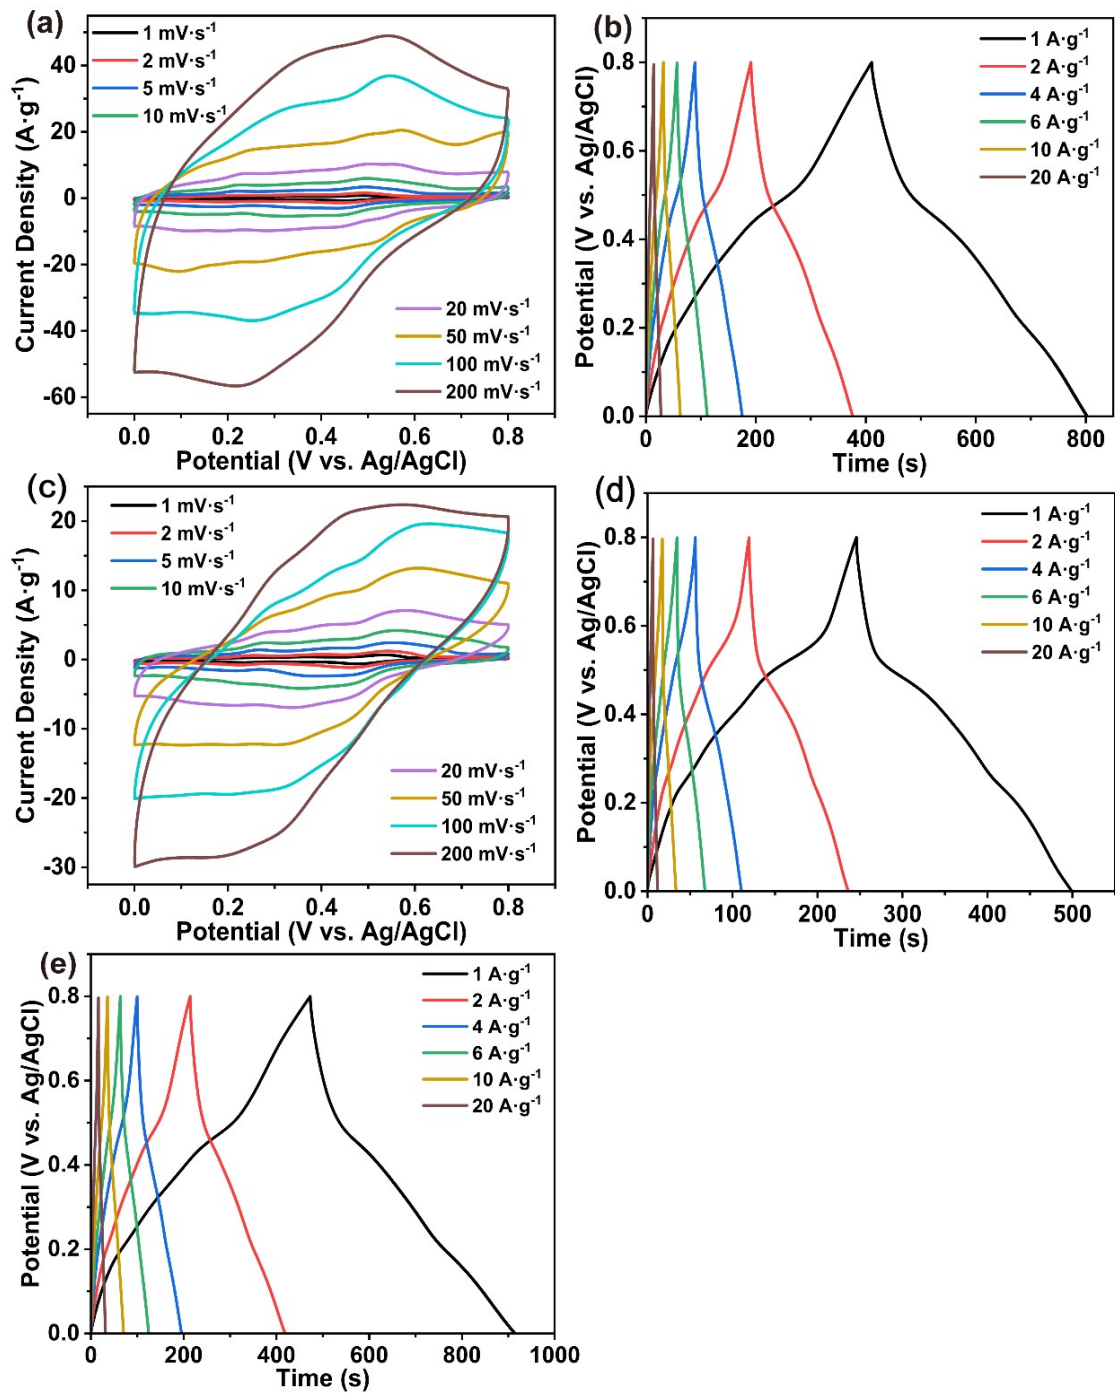

**Figure S9.** CV curves at scan rates from 1 to 200  $\text{mV}\cdot\text{s}^{-1}$  of (a) DMOGC-SDS electrode and (c) DMOGC-(BS-12) electrode; GCD curves at current densities from 1 to 20  $\text{A}\cdot\text{g}^{-1}$  of (b) DMOGC-SDS electrode, (d) DMOGC-(BS-12) electrode and (e) DMOGC-CTAB electrode.

**Table S3.** Capacitive performance of different DMOGC samples at different scan rates

| Samples       | Specific capacitance<br>(F·g <sup>-1</sup> ) at 1 mV·s <sup>-1</sup> | Specific capacitance<br>(F·g <sup>-1</sup> ) at 100 mV·s <sup>-1</sup> | Rate capability<br>(%) |
|---------------|----------------------------------------------------------------------|------------------------------------------------------------------------|------------------------|
| DMoGC-SDS     | 387                                                                  | 236                                                                    | 60.98                  |
| DMoGC-(BS-12) | 275                                                                  | 124                                                                    | 45.09                  |
| DMoGC-CTAB    | 422                                                                  | 262                                                                    | 62.09                  |

### Capacitance contribution of surface-control and diffusion-control

The current response ( $i$ ) at a fixed potential ( $V$ ) can be described as the combination of two separate mechanisms, namely capacitive effects ( $k_1 v$ ) and diffusion-controlled insertion ( $k_2 v^{0.5}$ ). Therefore, the electrical double layer capacitance ( $C_{DL}$ ) and the diffusion-controlled capacitance ( $C_D$ ) for the aerogel electrode according to equation:

$$i(V) = k_1 v + k_2 v^{0.5} \quad (1)$$

where  $v$  is the scan rate,  $k_1$  and  $k_2$  are proportionality constants related to the capacitive and diffusion-limited processes, respectively. By determining both  $k_1$  and  $k_2$ , it could distinguish the capacitive and diffusion capacitance, respectively. The calculated results are presented in **Table S4**.



**Table S4.** Calculated  $C_{EDL}$  and  $C_D$  of different DMOGC samples at different scan rates

| Scan rates<br>(mV·s <sup>-1</sup> ) | DMoGC-SDS                         |                               | DMoGC-(BS-12)                     |                               | DMoGC-CTAB                        |                               |
|-------------------------------------|-----------------------------------|-------------------------------|-----------------------------------|-------------------------------|-----------------------------------|-------------------------------|
|                                     | $C_{EDL}$<br>(F g <sup>-1</sup> ) | $C_D$<br>(F g <sup>-1</sup> ) | $C_{EDL}$<br>(F g <sup>-1</sup> ) | $C_D$<br>(F g <sup>-1</sup> ) | $C_{EDL}$<br>(F g <sup>-1</sup> ) | $C_D$<br>(F g <sup>-1</sup> ) |
| 1                                   | 174                               | 213                           | 66                                | 209                           | 211                               | 211                           |
| 2                                   | 174                               | 207                           | 65                                | 195                           | 211                               | 204                           |
| 5                                   | 174                               | 195                           | 65                                | 180                           | 211                               | 190                           |
| 10                                  | 174                               | 189                           | 66                                | 172                           | 211                               | 183                           |
| 20                                  | 174                               | 180                           | 70                                | 148                           | 211                               | 174                           |
| 50                                  | 174                               | 114                           | 77                                | 86                            | 211                               | 101                           |
| 100                                 | 174                               | 62                            | 81                                | 43                            | 212                               | 51                            |

### Calculation of b value

According to equation (2) and (3):

$$i(v) = av^b \quad (2)$$

$$\log(i) = b\log(v) + \log a \quad (3)$$

where  $i$  is the current density,  $v$  is the scan rate,  $a$  and  $b$  are variables. The  $b$  value can be determined from the slope of  $\log(i)$  versus  $\log(v)$  plot.

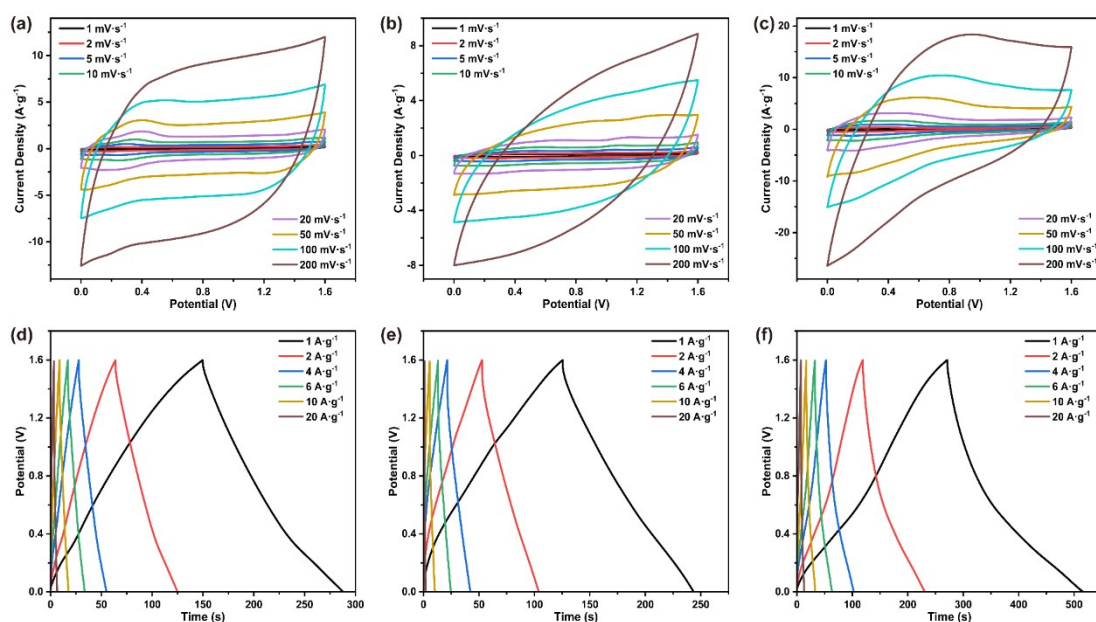

**Figure S10.** CV curves at scan rates from 1 to 200  $\text{mV}\cdot\text{s}^{-1}$  of (a) DMOGC-SDS SSC, (b) DMOGC-(BS-12) SSC and (c) DMOGC-CTAB SSC. GCD curves at current densities from 1 to 20  $\text{A}\cdot\text{g}^{-1}$  of (d) DMOGC-SDS SSC, (e) DMOGC-(BS-12) SSC and (f) DMOGC-CTAB SSC.

**Table S5.** Capacitive performances of SSC based on different DMOGC composites at different scan rates

| Samples       | Specific capacitance<br>( $\text{F}\cdot\text{g}^{-1}$ ) at 1 $\text{mV}\cdot\text{s}^{-1}$ | Specific capacitance<br>( $\text{F}\cdot\text{g}^{-1}$ ) at 200 $\text{mV}\cdot\text{s}^{-1}$ | Rate capability<br>(%) |
|---------------|---------------------------------------------------------------------------------------------|-----------------------------------------------------------------------------------------------|------------------------|
| DMoGC-SDS     | 100                                                                                         | 41                                                                                            | 41.03                  |
| DMoGC-(BS-12) | 89                                                                                          | 25                                                                                            | 28.09                  |
| DMoGC-CTAB    | 153                                                                                         | 65                                                                                            | 42.61                  |
